# Supplementary material for: Facile fabrication of a Prussian Blue film by direct aerosol deposition on a Pt electrode
Source: Royal Society of Chemistry journal article supplement (doi:10.1039/b906022g), 2009-01-01
Supplement: b906022g.pdf [file b906022g.pdf]

Supporting Information for

**Facile fabrication of Prussian Blue film by direct aerosol  
deposition on Pt electrode**

Zhenyu Chu<sup>a</sup>, Yu Liu<sup>a</sup>, Wanqin Jin<sup>\*a</sup>, Nanping Xu<sup>a</sup>, and Bernd Tiede<sup>b</sup>

<sup>a</sup> State Key Laboratory of Materials-Oriented Chemical Engineering,

College of Chemistry and Chemical engineering,

Nanjing University of Technology

5 Ximofan Road, Nanjing 210009, P. R. China

Tel.: (+86) 25-8317-2266

Fax: (+86) 25-8317-2292

E-mail: wqjin@njut.edu.cn

<sup>b</sup> Institut für Physikalische Chemie der Universität zu Köln, Luxemburger Str. 116, D-50939 Köln,

Germany

## **Supplement 1 (S1). Simulative section**

The performance of PB adsorbed on Pt surface was simulated at the level of DFT by Cambridge sequential total energy package (CASTEP). The Perdew–Burke–Ernzerhof functional (PBE) of gradient-corrected functional was chosen as the exchange-correlation functional. The electronic wavefunctions at each k-point were expanded in a plane-wave basis set up to 300eV. The Monkhorst-Pack k-points for the accuracy of the Brillouin zone sampling were set at fine level. Ultrasoft pseudopotential was used to perform with the lowest possible cutoff energy for the plane-wave basis set and the space was the reciprocal space. The SCF tolerance reached  $1 \times 10^{-6}$  eV/atom.

The Pt(110) surface was established through cutting from the Pt crystal and added the vacuum slab 8.00Å thickness. Then the Fe-C-N-Fe structure was added on the surface as the unit molecular for free adsorption. PB crystal was also optimized.

## Supplement 2 (S2). Simulated PDOS images of C in a PB crystal and PB adsorbed on Pt surface.

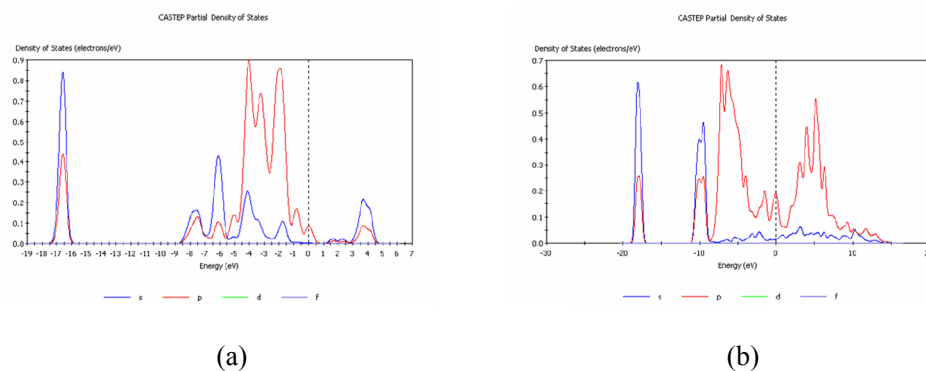

Fig. S2

Fig. S2. The partial density of states (PDOS) image for C in (a) PB crystal; (b) PB adsorbed on Pt (110) surface. (The colorful lines presented the contributions of different atom orbits.)

PDOS images presented the information of electronic structure. Fig. S2 illustrates the electronic orbit contributions of C atoms to the system of a PB crystal and a PB crystal on Pt (110) surface. The s and p orbits give the main influence to the whole system. The two images of the C atoms are different. Considering the simulative structure, we can conclude that there is an interaction between C and Pt atoms.

### Supplement 3 (S3). Table of simulated bond population and length.

Tab. S3

| Bond             | Population | Length(Å) |
|------------------|------------|-----------|
| C 001 -- N 001   | 1.49       | 1.24068   |
| N 001 -- Fe 001  | 0.67       | 1.73899   |
| C 001 -- Pt 002  | 0.36       | 2.19842   |
| C 001 -- Fe 002  | 0.35       | 1.87029   |
| Fe 002 -- Pt 003 | 0.09       | 2.55345   |
| Pt 001 -- Pt 003 | 0.36       | 2.55642   |
| Fe 002 -- Pt 002 | 0.35       | 2.56508   |
| Fe 001 -- Pt 001 | 0.75       | 2.59582   |

Table. S3. Data of simulated bond population and length obtained by Cambridge sequential total energy package (CASTEP).

Bond population is used to assess the covalent or ionic nature of a bond. The high value of the bond population indicates a covalent bond, while a low value indicates other interactions. We defined the Pt atom which was combined with C in Fig. 1 as Pt 002 before simulation. There was the interaction between Pt and C from the Table. It should be noted that the calculation result did not present the N-Pt bond. It was concluded that N atoms of PB had no contribution to adsorption.

## Supplement 4 (S4). Experimental section.

**1. Chemicals and Reagents.**  $\text{K}_4\text{Fe}(\text{CN})_6 \cdot 3\text{H}_2\text{O}$  (Sigma-Aldrich) and  $\text{FeCl}_3 \cdot 6\text{H}_2\text{O}$  (Sigma - Aldrich) were of analytical purity and used without further purification. All solutions were prepared with deionized water.

**2. Pretreatment of Pt electrode.** For keeping the Pt electrode clean, pretreatment was used on the platinum foil surface ( $7 \times 2 \text{ mm}^2$ ). The surface of the Pt electrode was polished as mirror using metallographical sand paper, then dipped into the Piranha solution (7:3 mixture of  $\text{H}_2\text{SO}_4/\text{H}_2\text{O}_2$ . Caution: *The mixture is strongly oxidizing and may detonate upon contact with organic material*) for 30 min and rinsed with water. After ultrasonic washing in water for 30 min, the Pt electrode was clean.

**3. Aerosol deposition of PB film on Pt electrode.** For the deposition of PB films, two solutions were prepared. Solution 1: 0.01 M  $\text{K}_4[\text{Fe}(\text{CN})_6]$  + 0.1 M KCl + 0.1 M HCl. Solution 2: 0.01 M  $\text{FeCl}_3$  + 0.1 M KCl + 0.1 M HCl. The prepared  $\text{K}_4\text{Fe}(\text{CN})_6$  and  $\text{FeCl}_3$  solutions were respectively filled in two ultrasonic nebulizers (Shanghai Yu Yue Medical Equipment Co., Ltd, China; Size:  $240 \times 130 \times 200 \text{ mm}^3$ ; Power: 50W; Frequency: 1.7 MHz.). The Pt electrode was fixed in one airtight organic glass container. Then,  $\text{K}_4\text{Fe}(\text{CN})_6$  aerosol was continuously injected into the container for two hours. The average injection rate is  $1.1 \text{ ml} \cdot \text{min}^{-1}$ . Subsequently,  $\text{FeCl}_3$  aerosol was deposited after the former aerosol exhausted. This process lasted two hours. Finally, the prepared electrodes were cleaned with deionized water and heated at  $100 \text{ }^\circ\text{C}$  for one hour to dehydrate. The PB film samples of different deposition time (2, 3, 4, 5, 6 and 7 h) were also prepared for characterization. Both of the  $\text{K}_4\text{Fe}(\text{CN})_6$  and  $\text{FeCl}_3$  aerosols were adsorbed in the same period.

## Supplement 5 (S5). AFM images of PB films for different deposition time

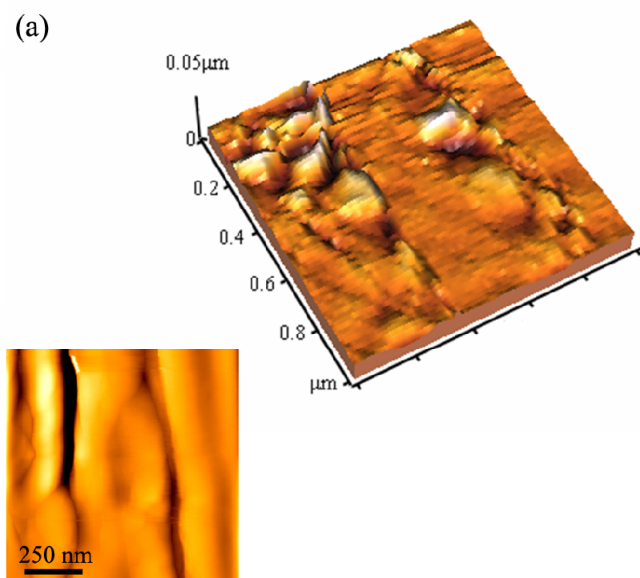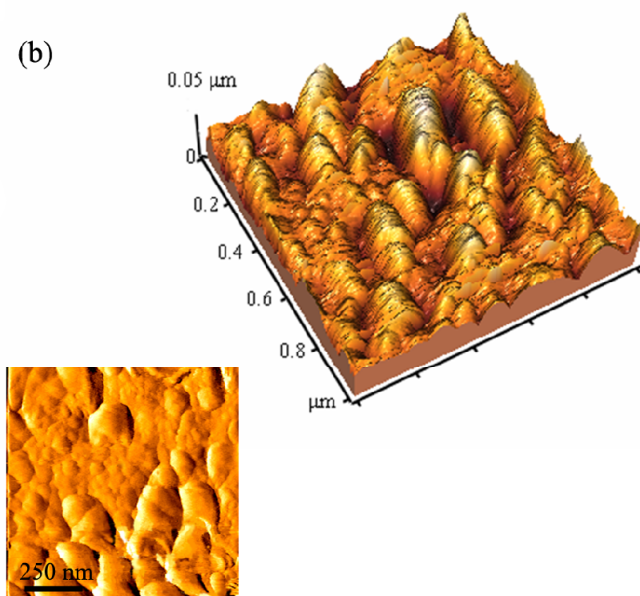

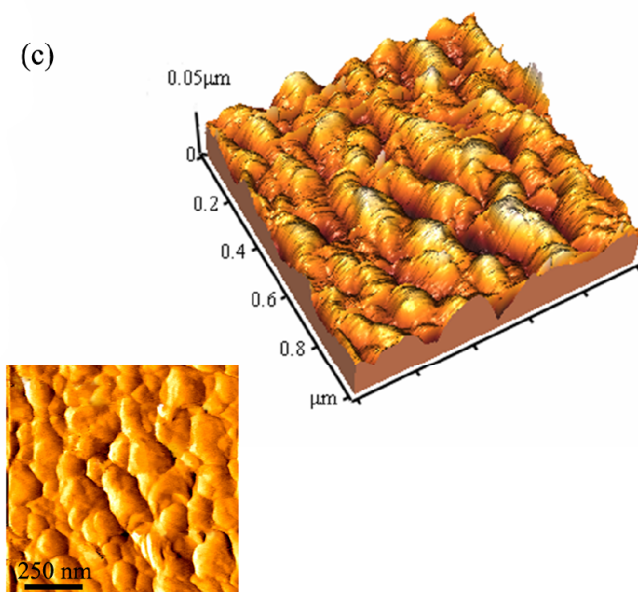

Fig. S5

Fig. S5. AFM 2D and 3D images of PB film which were prepared for 3 h (a), 4 h (b) and 5 h (c) on the Pt surface

AFM characterization operating in contact mode was used to study the morphology of PB films which were prepared on the Pt surface using the aerosol deposition approach. Samples of different total deposition time (3 h, 4 h and 5 h) were compared. From the 2D images, we can find that the amount of PB particles increased with the deposition time, and the whole Pt surface was covered by PB particles. Meanwhile, the particle size also increased with the time. For the deposition time of 3, 4 and 5 h the mean particle sizes were analysed to be ca. 84 nm, 85 nm and 91 nm, respectively, while the observed average heights were ca. 17 nm, 36 nm and 40 nm, respectively.
